# Supplementary material for: Electrocatalytic CO2 reduction to ethylene over ZrO2/Cu-Cu2O catalysts in aqueous electrolytes
Source: Royal Society of Chemistry journal article supplement (doi:10.1039/d1gc04284j), 2022-01-01
Supplement: d1gc04284j1.pdf [file d1gc04284j1.pdf]

## *Supporting information*

### **Electrocatalytic CO<sub>2</sub> reduction to ethylene over ZrO<sub>2</sub>/Cu-Cu<sub>2</sub>O catalysts in aqueous electrolytes**

Pan-Pan Guo,<sup>a</sup> Zhen-Hong He,<sup>a,\*</sup> Shao-Yan Yang,<sup>b</sup> Weitao Wang,<sup>a</sup> Kuan Wang,<sup>a</sup> Cui-Cui Li,<sup>a</sup> Yuan-Yuan Wei,<sup>a</sup> Zhao-Tie Liu,<sup>a,b,\*</sup> Buxing Han<sup>c,\*</sup>

<sup>a</sup> Shaanxi Key Laboratory of Chemical Additives for Industry, College of Chemistry and Chemical Engineering, Shaanxi University of Science & Technology, Xi'an 710021, China. E-mails: hezhenhong@sust.edu.cn; ztliu@snnu.edu.cn

<sup>b</sup> School of Chemistry & Chemical Engineering, Shaanxi Normal University, Xi'an 710119, China. E-mail: ztliu@snnu.edu.cn

<sup>c</sup> Beijing National Laboratory for Molecular Sciences, CAS Key Laboratory of Colloid and Interface and Thermodynamics, Institute of Chemistry, Chinese Academy of Sciences, Beijing 100190, China. E-mail: Hanbx@iccas.ac.cn

## 1. Experimental section

### 1.1 Materials

$\text{Cu}(\text{NO}_3)_2 \cdot 3\text{H}_2\text{O}$  (>99%, Adamas Reagent Co., Ltd.),  $\text{Cu}(\text{OAc})_2 \cdot \text{H}_2\text{O}$  (>99.0%, Innochem),  $\text{Zr}(\text{NO}_3)_2 \cdot 5\text{H}_2\text{O}$  (>99%, Adamas Reagent Co., Ltd.),  $\text{NaCO}_3$  (>99.5%, Shanghai Macklin Biochemical Co., Ltd.),  $\text{CuCl}_2 \cdot 3\text{H}_2\text{O}$  (>99.0%, Guangzhou Jinhuada Chemical Reagent Co., Ltd),  $\text{Cu}(\text{acac})_2$  (97%, Shanghai Macklin Biochemical Co., Ltd.), Toray carbon paper (CP, TGP-H-60, 1 cm  $\times$  1 cm), and Nafion D-521 dispersions (5 % w/w in water and 1-propanol,  $\geq$  0.92 meq/g exchange capacity) are obtained from commercial resources.  $\text{CO}_2$  (99.999%) and Ar (99.999%) are provided by Xi'an Teda Cryogenic Equipment Co., Ltd. All other chemicals are analytically grade and obtained from commercial companies and used without further purification.

### 1.2 Synthesis of the Cu-Zr bimetallic catalyst

The Cu-Zr bimetallic catalysts were prepared by a co-precipitation method. For the synthesis of the  $\text{ZrO}_2/\text{Cu-Cu}_2\text{O}$  catalyst with a Cu/Zr molar ratio of 7/1, the synthesis procedures are as follows. 0.2625 mmol of  $\text{Cu}(\text{NO}_3)_2 \cdot 3\text{H}_2\text{O}$  and 0.0375 mmol of  $\text{Zr}(\text{NO}_3)_4 \cdot 5\text{H}_2\text{O}$  were dissolved in 25 mL of water to form a homogeneous solution, which was dropped into a  $\text{Na}_2\text{CO}_3$  solution (0.5 M, 100 mL) slowly under stirring. After that, the mixture was stirred for 12 h at room temperature, and then the precipitated solid was separated by centrifugation. After washing for 5 times, the obtained solid was dried at 60 °C for 10 h, and then grounded into powder and subsequently calcinated at 550 °C for 3 h (5 °C/min). Followed that, the solid was reduced at 700 °C for 3 h (5 °C/min) in an  $\text{H}_2$  flow (30 mL/min). Upon reduction, the catalyst, denoted as  $\text{ZrO}_2/\text{Cu-Cu}_2\text{O}$ , was passivated in a flow of 1% $\text{O}_2/\text{N}_2$  for 30 min and then stored for uses.

### 1.3 Characterization

The prepared catalysts were measured by transmission electron microscope (FEI Tecnai G2 F20 TEM) at a working voltage of 200 kV. The XRD patterns of the catalysts were recorded on Rigaku D/Max 2500 X-ray diffractometer using the  $\text{Cu-K}\alpha$  radiation source ( $\lambda = 0.154$  nm) and the scan speed was 10° min<sup>-1</sup>. The X-ray photoelectron spectroscopy (XPS) was performed on the ESCA Lab 220I-XL electron spectrometer with a 300 W Al  $\text{K}\alpha$  radiation. The binding energy of C1s (284.8 eV) is used as a reference. The actual compositions of Cu and Zr were tested by inductively coupled

plasma optical emission spectroscopy (ICP-OES, Vista-MPX).

The H<sub>2</sub>-TPR study was conducted on an Auto Chem II 2920 (Micromeritics, USA). Prior to the tests, 80 mg of catalyst were placed in a U-type tube, which were heated to 300 °C for 1 h in a He flow (30 mL/min). After that, the He gas was changed to the mixture gases of 10%H<sub>2</sub>/Ar (50 mL/min). After 1 h, the temperature was raised from 50 °C to 700 °C with a heating rate of 10 °C/min and the H<sub>2</sub> consumption was monitored by a thermal conductivity detector.

N<sub>2</sub> and CO<sub>2</sub> adsorption and/or desorption isotherms were tested on an ASAP 2460 (Micromeritics, USA) at -196 K and 298 K, respectively. Prior to the tests, the samples were degassed at 160 °C for 12 h under vacuum.

## 1.4 Fabrication of electrodes

The electrode was prepared according to the references [1, 2]. Specifically, 5 mg of catalyst were dispersed in a mixed solvent of 800 μL isopropanol and 20 μL Nafion (5 wt%) under ultrasonic for 1 h at room temperature. The mixture was dropped on a carbon paper (1 × 1 cm<sup>2</sup>, TGP-H-60). After the solvent was removed under vacuum, the catalyst supported on the electrode was weighed, and about 4.5 mg/cm<sup>2</sup> of catalyst were used.

## 1.5 Electrocatalytic CO<sub>2</sub> reduction

The CO<sub>2</sub>RR was carried out in an H-type electrolytic cell linked with an electrochemical workstation (CHI 660E). In a typical reaction, a working electrode with catalyst, a reference electrode Ag/AgCl, and a counter electrode (Pt) made up a three-electrode system, which was placed in KCl electrolyte (45 mL) and separated by Nafion-117 membrane. Prior to the electrolysis, the electrolyte was bubbled with Ar or CO<sub>2</sub> for 30 min. All experiments were measured at atmospheric pressure and room temperature and all potentials reported in the present paper were referenced to a reversible hydrogen electrode (RHE), as calculated by Eq. (1):

$$\text{Potential in RHE} = \text{Applied potential vs. Ag/AgCl} + 0.222 \text{ V} + 0.059 \times \text{pH} \quad (1)$$

## 1.6 Product analysis

The gaseous products of electrochemical experiments were analyzed by a gas chromatography (GC, FuLi 9790), which was equipped with FID and TCD detectors. The liquid products were analyzed by <sup>1</sup>H NMR (Bruker Avance III 400 HD spectrometer) in deuterium oxide-d<sub>2</sub> with DMSO as an internal standard. The Faraday Efficiency (FE) of the product can be obtained according to the

ratio of the electricity consumed by the product to the total electricity during the period, and the formula is as the Eq. (2):

$$FE = \frac{nzF}{Q} \times 100\% \quad (2)$$

where  $n$  is the amount of substance in each product,  $z$  represents the number of transferred electrons to generate 1 mole product,  $F$  is Faradaic constant (96485 C/mol), and  $Q$  is the total charge.

### 1.7 Double-layer capacitance tests ( $C_{dl}$ )

The electrochemical active surface area is proportional to the value of double-layer capacitance ( $C_{dl}$ ). The values of  $C_{dl}$  were tested by measuring the capacitive current associated with double-layer charging from the scan-rate dependence of cyclic voltammogram (CV) in the H-type electrolysis cell. The CV was obtained from 0.07 V to -0.7 V vs. RHE. The  $C_{dl}$  was estimated by plotting the  $\Delta j (j_a/j_c)$  at -0.3 V vs. RHE against the scan rates, in which the  $j_a$  and  $j_c$  were the anodic and cathodic current density, respectively. The scanning rates were 10, 20, 30, 40, 50, 60, 70, 80, and 90 mV/s, respectively.

### 1.8 Electrochemical impedance spectroscopy tests (EIS)

The electrochemical impedance spectroscopy (EIS) study was carried out in 0.1 M KCl at an open circuit voltage (OCV) with an amplitude of 5 mV of  $10^{-1}$  to  $10^6$  Hz.

## 2. DFT calculation

The first-principles<sup>[3, 4]</sup> were chosen to perform all spin-polarization density functional theory (DFT) calculations within the generalized gradient approximation (GGA) using the Perdew-Burke-Ernzerhof (PBE)<sup>[5]</sup> formulation. We adopted the projected augmented wave (PAW) potentials<sup>[6, 7]</sup> to describe the ionic cores and take valence electrons into account using a plane wave basis set with a kinetic energy cutoff of 450 eV. Partial occupancies of the Kohn-Sham orbitals were allowed using the Gaussian smearing method and a width of 0.05 eV. The electronic energy was considered self-consistent when the energy change was smaller than  $10^{-6}$  eV. A geometry optimization was considered convergent when the energy change was smaller than 0.05 eV  $\text{\AA}^{-1}$ . The vacuum spacing in a direction perpendicular to the plane of the structure is 15  $\text{\AA}$ . The Brillouin zone integration is

performed using  $2 \times 2 \times 1$  Monkhorst-Pack k-point sampling for a structure. Finally, the adsorption energies ( $E$ ) were calculated by Eq. (3):

$$E = E_{\text{ad/sub}} - E_{\text{ad}} - E_{\text{sub}} \quad (3)$$

where  $E_{\text{ad/sub}}$ ,  $E_{\text{ad}}$ , and  $E_{\text{sub}}$  are the total energies of the optimized adsorbate/substrate system, the adsorbate in the structure, and the clean substrate, respectively. The free energy was calculated using the Eq. (4):

$$G = E + ZPE - TS \quad (4)$$

where  $G$ ,  $E$ ,  $ZPE$ , and  $TS$  are the free energy, total energy from DFT calculations, zero-point energy, and entropic contributions, respectively. In our calculation, the  $U$  correction was set as 3.68 and 3.42 eV for Cu and Zr atoms in our systems.

### 3. Figures and Tables

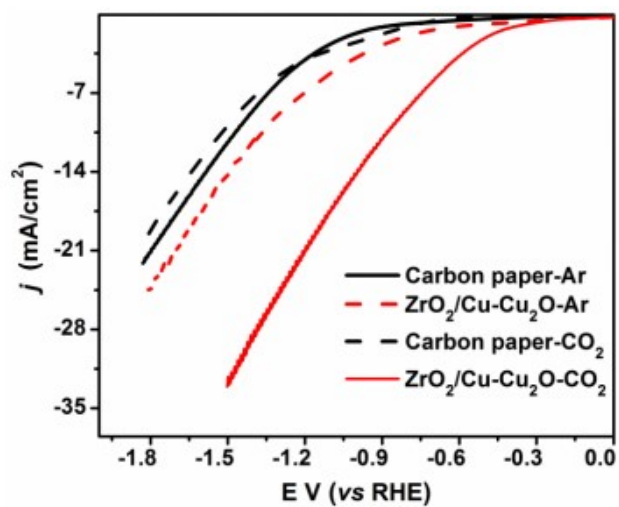

**Fig. S1** LSV curves obtained over the ZrO<sub>2</sub>/Cu-Cu<sub>2</sub>O catalyst and the carbon paper (CP, TGP-H-60) in Ar or CO<sub>2</sub> saturated 0.1 M KCl electrolytes.

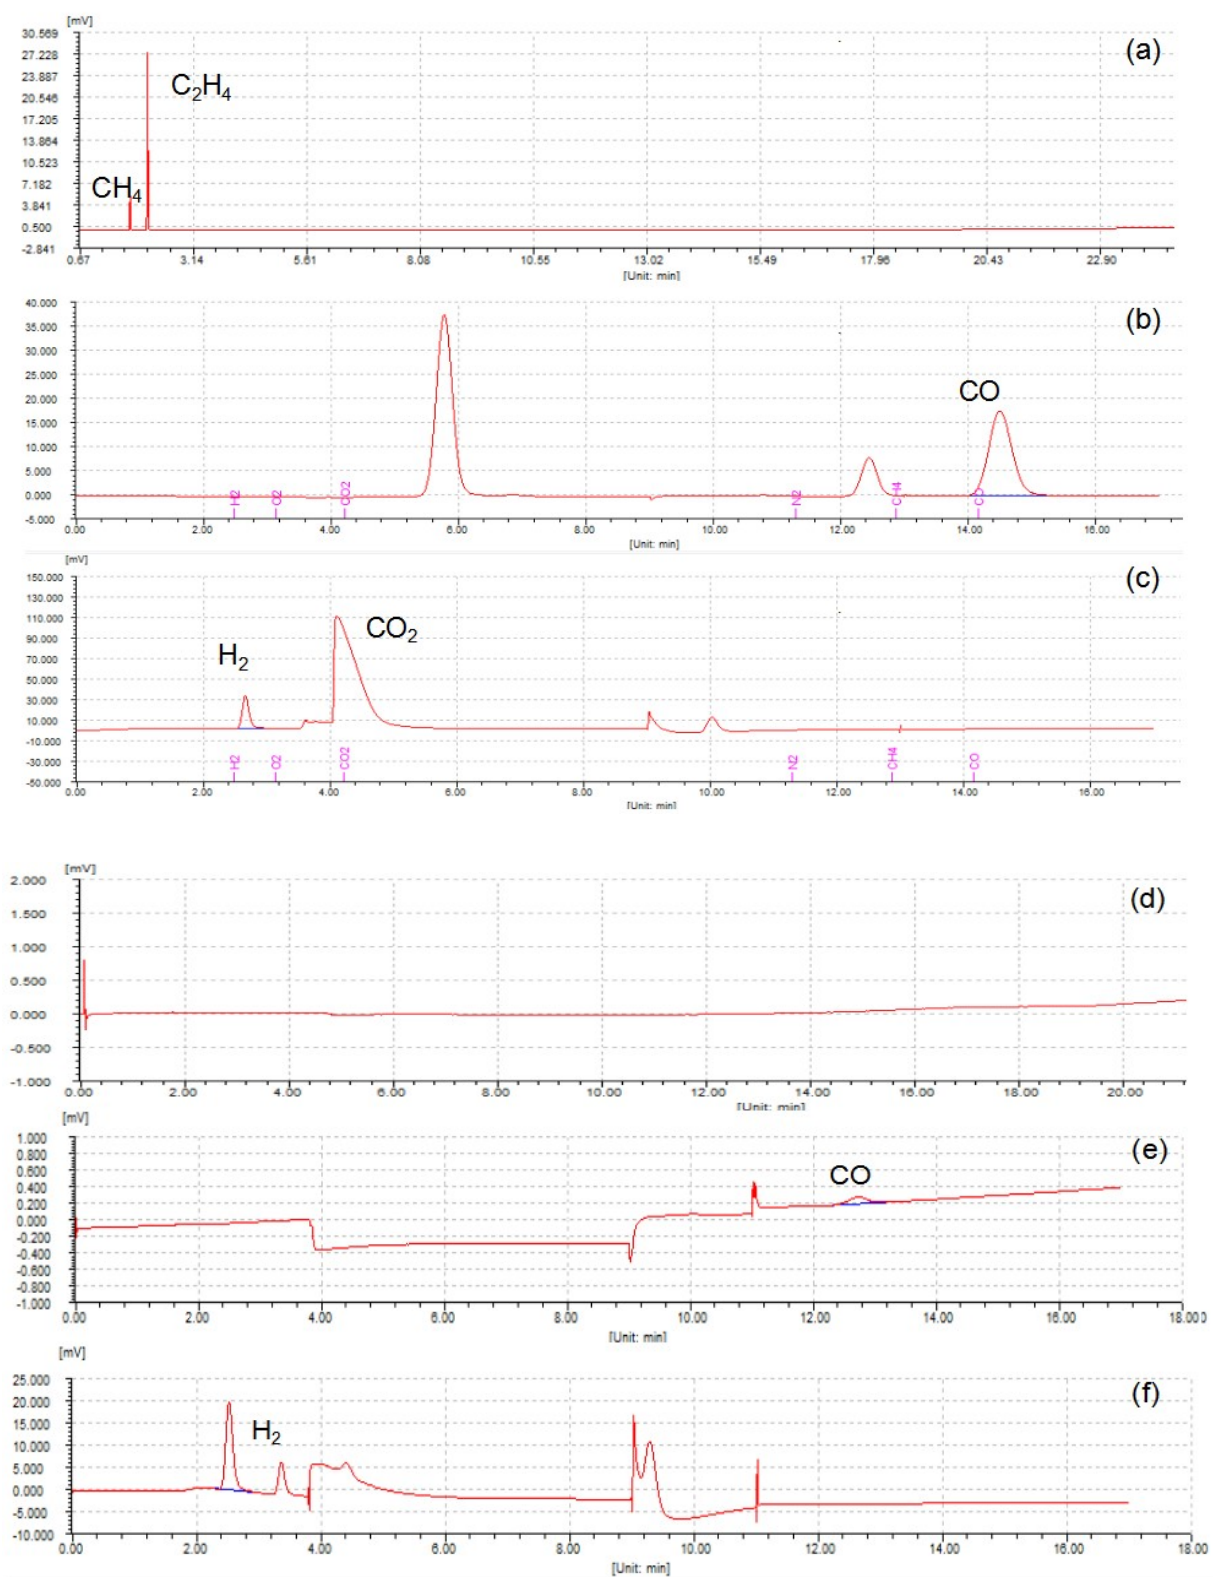

**Fig. S2** Typical GC spectra obtained over the ZrO<sub>2</sub>/Cu-Cu<sub>2</sub>O catalyst in CO<sub>2</sub> saturated 0.1 M KCl electrolyte (a, FID detector; b, FID detector with a methane converter; and c, TCD detector, respectively), and in Ar saturated 0.1 M KCl electrolyte (d, FID detector; b, FID detector with a methane converter; and f, TCD detector, respectively).

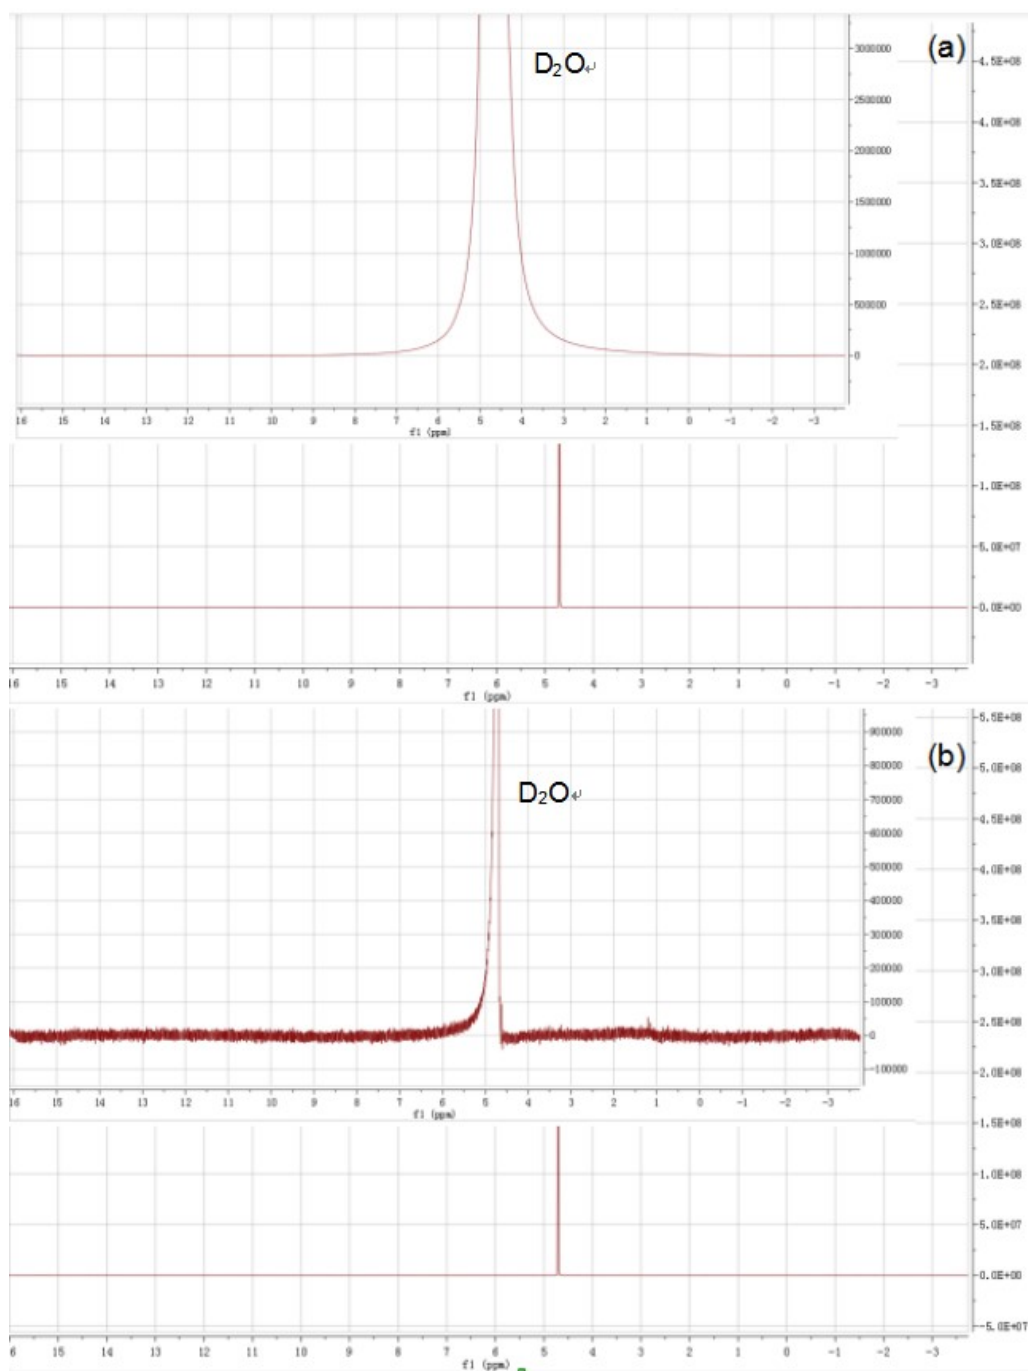

**Fig. S3**  $^1\text{H}$  NMR spectra of the liquid obtained from the  $\text{CO}_2\text{RR}$  over the  $\text{ZrO}_2/\text{Cu-Cu}_2\text{O}$  catalyst in  $\text{CO}_2$  (a) and Ar (b) saturated  $0.1\text{ M KCl}$  electrolytes.



**Table S1.** Catalytic performances for the electrocatalytic reduction CO<sub>2</sub> to C<sub>2</sub>H<sub>4</sub> over different catalysts in H-type cell

| Entry | Catalyst                                          | Electrolyte                          | E V(vs RHE)  | j (mA/cm <sup>2</sup> ) | FE C <sub>2</sub> H <sub>4</sub> (%) | Ref. |
|-------|---------------------------------------------------|--------------------------------------|--------------|-------------------------|--------------------------------------|------|
| 1     | n-CuNS                                            | 0.1 M K <sub>2</sub> SO <sub>4</sub> | -1.18        | 58.8                    | 83.2%                                | [8]  |
| 2     | p-NG/Cu                                           | 0.5 M KHCO <sub>3</sub>              | -0.9         | 9                       | 79                                   | [9]  |
| 3     | branched CuO                                      | 0.1 M KHCO <sub>3</sub>              | -1.05        | ~ 30                    | 68± 5%                               | [10] |
| 4     | Cu <sub>2</sub> (OH) <sub>2</sub> CO <sub>3</sub> | 0.1 M KHCO <sub>3</sub>              | -0.982       | -                       | 66                                   | [11] |
| 5     | nanostructured oxide layer                        | 0.1 M KHCO <sub>3</sub>              | -0.9         | 21                      | 60                                   | [12] |
| 6     | Cu/PANI-CP                                        | 0.1 M KCl                            | -1.2         | 30.2                    | 59.4                                 | [13] |
| 7     | B-CuO                                             | 0.1 M K <sub>2</sub> SO <sub>4</sub> | -1.1         | 18.2                    | 58.4                                 | [14] |
| 8     | Cu-based NP/C                                     | 0.1 M KHCO <sub>3</sub>              | -1.1         | 11.4                    | 57.3                                 | [15] |
| 9     | Cu <sub>1.8</sub> Se Nanowires                    | 0.1 M KHCO <sub>3</sub>              | -1.1         | 14.5                    | 55                                   | [16] |
| 10    | Cu(B)-2                                           | 0.1 M KCl                            | -1.1         | 70                      | 52                                   | [17] |
| 11    | Cu-Sb alloys                                      | 0.1 M KCl                            | -1.19        | 28.5                    | 49.7                                 | [18] |
| 12    | CuO-CeO <sub>2</sub> /CB                          | 0.1 M KHCO <sub>3</sub>              | -1.1         | 7.5                     | 48                                   | [19] |
| 13    | Oxygen-bearing copper (OBC)                       | 0.5 M KHCO <sub>3</sub>              | -0.95        | 44.7                    | 45                                   | [20] |
| 14    | Cu nanocube                                       | 0.1 M KHCO <sub>3</sub>              | -1.1         | 5.5                     | 41.1                                 | [21] |
| 15    | Ag/Cu                                             | 0.5 M KHCO <sub>3</sub>              | -1.2         | 8.45                    | 41.3                                 | [22] |
| 16    | Cu nanocube (44 nm)                               | 0.1 M KHCO <sub>3</sub>              | -1.1         | 5.7                     | 41                                   | [23] |
| 18    | Ag-Cu Nanodimers                                  | 0.1 M KHCO <sub>3</sub>              | -1.1         | 32.5                    | 40                                   | [24] |
| 19    | CuO <sub>2</sub> Cl <sub>y</sub> nanocube         | 0.1 M KHCO <sub>3</sub>              | -1.05        | -                       | 39.7                                 | [25] |
| 20    | Cu(I) oxide films                                 | 0.1 M KHCO <sub>3</sub>              | -0.99        | 30                      | 38.79                                | [26] |
| 21    | Cu Mesopore                                       | 0.5 M KHCO <sub>3</sub>              | -1.7 vs. NHE | 14.3                    | 38                                   | [27] |
| 22    | Cu <sub>2</sub> (OH) <sub>3</sub> Cl              | 0.1 M KHCO <sub>3</sub>              | -1.2         | 22.0                    | 36                                   | [28] |
| 23    | Copper nanoparticle                               | 0.1 M KClO <sub>4</sub>              | -1.1         | -                       | 36                                   | [29] |
| 24    | Cu <sub>2</sub> O-Derived Cu                      | 0.1 M KHCO <sub>3</sub>              | -1.0         | 1.3                     | 30.6                                 | [30] |
| 25    | Polycrystalline Cu                                | 0.1 M KHCO <sub>3</sub>              | -1.1         | 49.8                    | 26.9                                 | [31] |
| 26    | Cu/PANI                                           | 0.1 M KHCO <sub>3</sub>              | -1.08        | 27.5                    | 26                                   | [32] |

|    |                                        |                         |                 |      |      |           |
|----|----------------------------------------|-------------------------|-----------------|------|------|-----------|
| 27 | Cu <sub>2</sub> O/NCS                  | 0.1 M KHCO <sub>3</sub> | -1.3            | 9.8  | 24.7 | [33]      |
| 28 | Cu <sub>2</sub> O electrodes           | 0.5 M KHCO <sub>3</sub> | -1.9 vs AgCl/Ag | 10   | 20   | [34]      |
| 29 | B-OD-Cu                                | 0.1 M KHCO <sub>3</sub> | -1.05           | 33.4 | 18.2 | [35]      |
| 30 | Cu <sub>3</sub> Pd <sub>7</sub>        | 0.5 M KHCO <sub>3</sub> | -1.07           | 1.7  | 14.1 | [36]      |
| 31 | n-Cu NPs                               | 0.1 M KHCO <sub>3</sub> | -1.15           | 1.74 | 5    | [37]      |
| 32 | ZrO <sub>2</sub> /Cu-Cu <sub>2</sub> O | 0.1 M KCl               | -1.28           | 24   | 62.5 | This work |

---

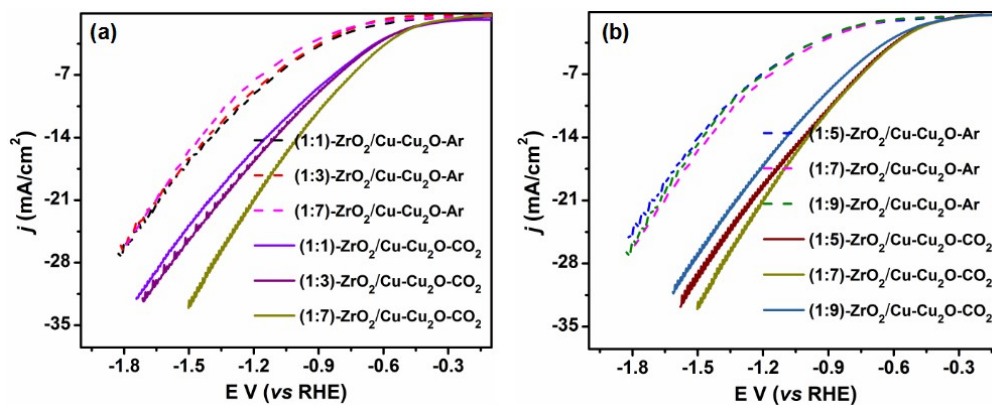

**Fig. S4** LSV curves of Cu-Zr bimetallic catalysts with different Cu/Zr molar ratios in CO<sub>2</sub> saturated electrolyte. (1:7)-ZrO<sub>2</sub>/Cu-Cu<sub>2</sub>O-CO<sub>2</sub> means the ZrO<sub>2</sub>/Cu-Cu<sub>2</sub>O catalyst with a Zr/Cu ratio of 1:7 proceeded in CO<sub>2</sub> saturated 0.1 M KCl electrolyte.

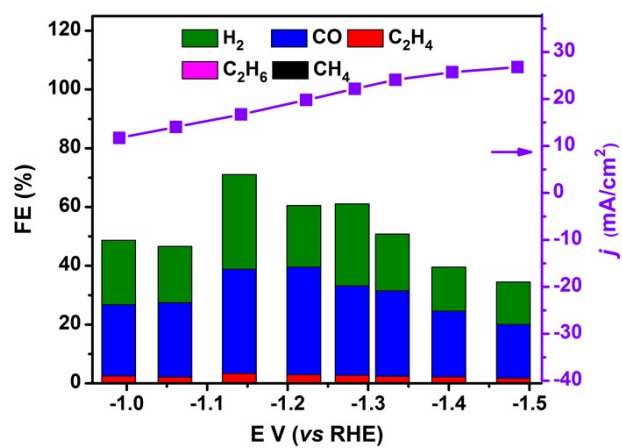

**Fig. S5** FE and total current densities over the  $\text{ZrO}_2/\text{Cu-Cu}_2\text{O}$  catalyst reduced via an electro-reduction method.

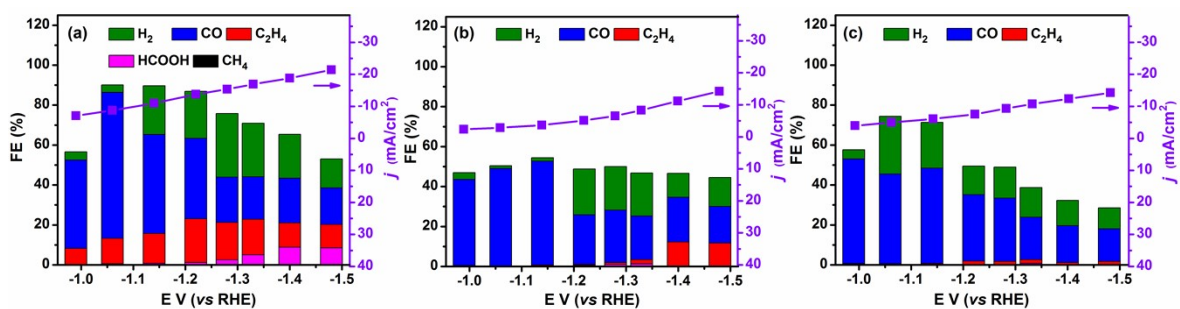

**Fig. S6** Catalytic performances of the CO<sub>2</sub>RR over different catalysts derived from different copper(II) salts, including CuCl<sub>2</sub>·2H<sub>2</sub>O (a), Cu(OAc)<sub>2</sub>·H<sub>2</sub>O (b), and Cu(acac)<sub>2</sub> (c), respectively.

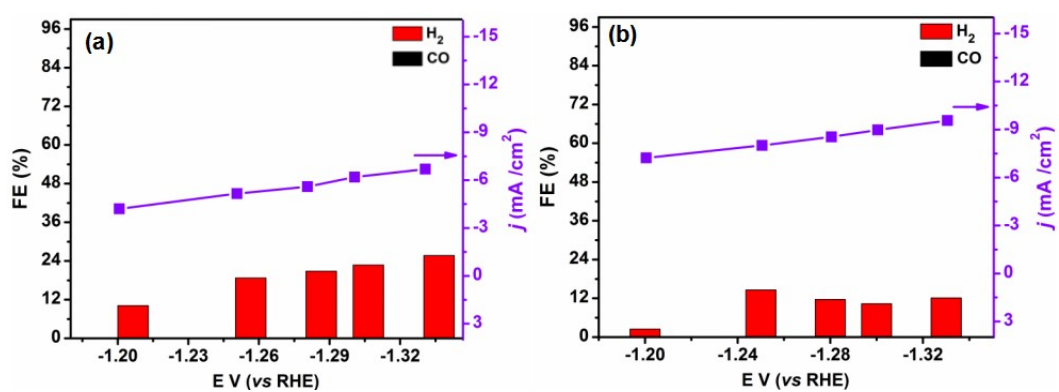

**Fig. S7** FEs and total current densities obtained from the CO<sub>2</sub>RR over the carbon paper (a) and the ZrO<sub>2</sub>/Cu-Cu<sub>2</sub>O catalyst (b) in Ar saturated 0.1 M KCl electrolyte.

**Table S2** FEs of products in the CO<sub>2</sub>RR over the ZrO<sub>2</sub>/Cu-Cu<sub>2</sub>O catalyst in different electrolytes

| Entry | Electrolyte<br>(0.1 M)          | E V (vs RHE) | FE (%)          |                               |                               |      |                |
|-------|---------------------------------|--------------|-----------------|-------------------------------|-------------------------------|------|----------------|
|       |                                 |              | CH <sub>4</sub> | C <sub>2</sub> H <sub>6</sub> | C <sub>2</sub> H <sub>4</sub> | CO   | H <sub>2</sub> |
| 1     |                                 | -1.25        | 0.9             | 1.8                           | 48                            | 25.0 | 16.2           |
| 2     | KCl                             | -1.28        | 1.8             | 0.7                           | 62.5                          | 22.6 | 13.1           |
| 3     |                                 | -1.30        | 2.7             | 3.2                           | 54.3                          | 32.3 | 12.0           |
| 4     |                                 | -1.25        | 6               | 0.77                          | 43.1                          | 18.2 | 25.3           |
| 5     | KHCO <sub>3</sub>               | -1.28        | 5.2             | 0.71                          | 48.5                          | 22.8 | 16.3           |
| 6     |                                 | -1.30        | 4.6             | 0.62                          | 53.3                          | 21.4 | 12.7           |
| 7     |                                 | -1.25        | 1.5             | 1.1                           | 8.1                           | 27.1 | 37.9           |
| 8     | K <sub>2</sub> CO <sub>3</sub>  | -1.28        | 0.6             | 1.1                           | 36.2                          | 27.8 | 14.9           |
| 9     |                                 | -1.30        | 2.0             | 1.4                           | 11.7                          | 23.7 | 40.4           |
| 10    |                                 | -1.25        | 0.5             | 0.8                           | 3.0                           | 19.0 | 28.4           |
| 11    | K <sub>2</sub> HPO <sub>4</sub> | -1.28        | 6.1             | 0.8                           | 3.9                           | 17.1 | 47.9           |
| 12    |                                 | -1.30        | 3.2             | 0.8                           | 5.9                           | 20.3 | 27.8           |
| 13    |                                 | -1.25        | 17.0            | 0.8                           | 25.7                          | 17.3 | 6.6            |
| 14    | NaCl                            | -1.28        | 30.9            | 0.7                           | 50.9                          | 21.1 | 5.5            |
| 15    |                                 | -1.30        | 41.5            | 0.5                           | 39.7                          | 12.4 | 14.2           |
| 16    |                                 | -1.25        | 18.4            | 0.7                           | 11.8                          | 12.3 | 14.7           |
| 17    | Na <sub>2</sub> SO <sub>4</sub> | -1.28        | 30.9            | 0.7                           | 23.6                          | 11.3 | 42.8           |
| 18    |                                 | -1.30        | 29.5            | 0.6                           | 18.3                          | 14.1 | 56.3           |
| 19    |                                 | -1.25        | 13.7            | 1.2                           | 13.3                          | 8.5  | 13.7           |
| 20    | NaHCO <sub>3</sub>              | -1.28        | 8.4             | 0.9                           | 9.9                           | 1.7  | 28.4           |
| 21    |                                 | -1.30        | 4.2             | 0.8                           | 4.4                           | 5.9  | 14.3           |
| 22    |                                 | -1.25        | 14.2            | 0.8                           | 5.8                           | 10.6 | 40.3           |
| 23    | Na <sub>2</sub> CO <sub>3</sub> | -1.28        | 11.4            | 0.7                           | 6.6                           | 7.2  | 29.2           |
| 24    |                                 | -1.30        | 10.4            | 0.6                           | 5.7                           | 6.4  | 26.7           |

**Table S3.** The composition of the ZrO<sub>2</sub>/Cu-Cu<sub>2</sub>O catalyst

| Catalyst                               | Elements | Surface atomic concentration (%) | Surface Cu/Zr molar ratio <sup>a</sup> | Cu/Zr molar ratio <sup>b</sup> | Cu/Zr molar ratio <sup>c</sup> |
|----------------------------------------|----------|----------------------------------|----------------------------------------|--------------------------------|--------------------------------|
| ZrO <sub>2</sub> /Cu-Cu <sub>2</sub> O | Cu       | 18.1                             | 2.3/1                                  | 7/1                            | 6.79/1                         |
|                                        | Zr       | 7.8                              |                                        |                                |                                |

<sup>a</sup>XPS result, <sup>b</sup>feed ratio, <sup>c</sup>ICP-OES result.



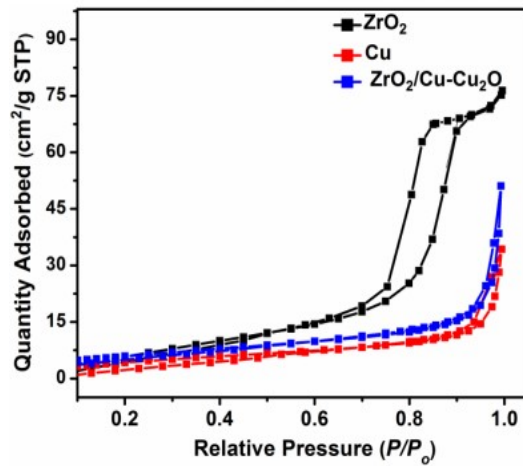

**Fig. S8** The N<sub>2</sub> adsorption/desorption isotherms of the Cu, ZrO<sub>2</sub>, and ZrO<sub>2</sub>/Cu-Cu<sub>2</sub>O catalyst.

**Table S4.** The analysis results of N<sub>2</sub> adsorption/desorption isotherms for catalysts

| Catalysts                              | BET surface area (m <sup>2</sup> /g) | Pore size (nm) | Pore volume (cm <sup>3</sup> /g) |
|----------------------------------------|--------------------------------------|----------------|----------------------------------|
| ZrO <sub>2</sub>                       | 40                                   | 9              | 0.12                             |
| Cu                                     | 15                                   | 11             | 0.04                             |
| ZrO <sub>2</sub> /Cu-Cu <sub>2</sub> O | 18                                   | 14             | 0.08                             |

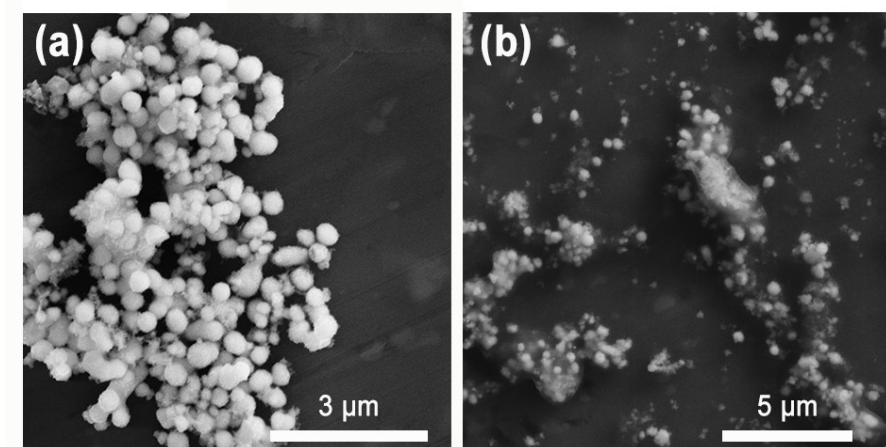

**Fig. S9** SEM images of the fresh (a) and used (b)  $\text{ZrO}_2/\text{Cu-Cu}_2\text{O}$  catalysts.

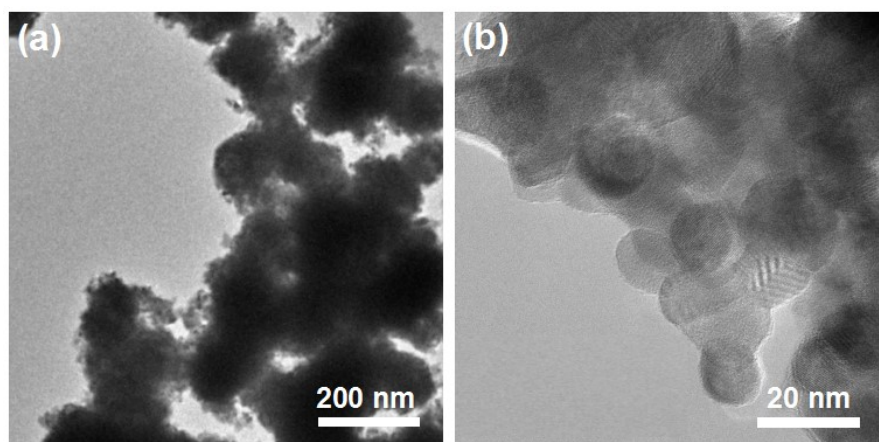

**Fig. S10** TEM images of the used  $\text{ZrO}_2/\text{Cu-Cu}_2\text{O}$  catalyst.

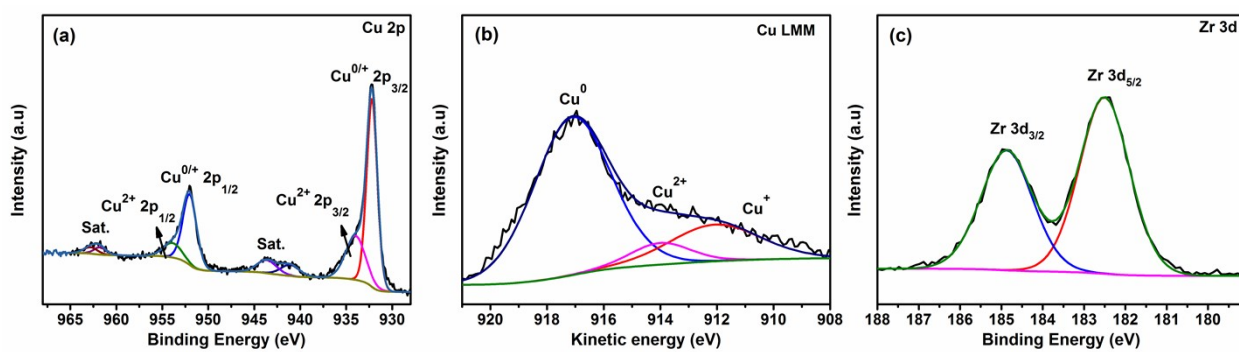

**Fig. S11** XPS spectra of (a) Cu 2p, (b) Cu LMM, and (c) Zr 3d for the used  $\text{ZrO}_2/\text{Cu-Cu}_2\text{O}$  catalyst.

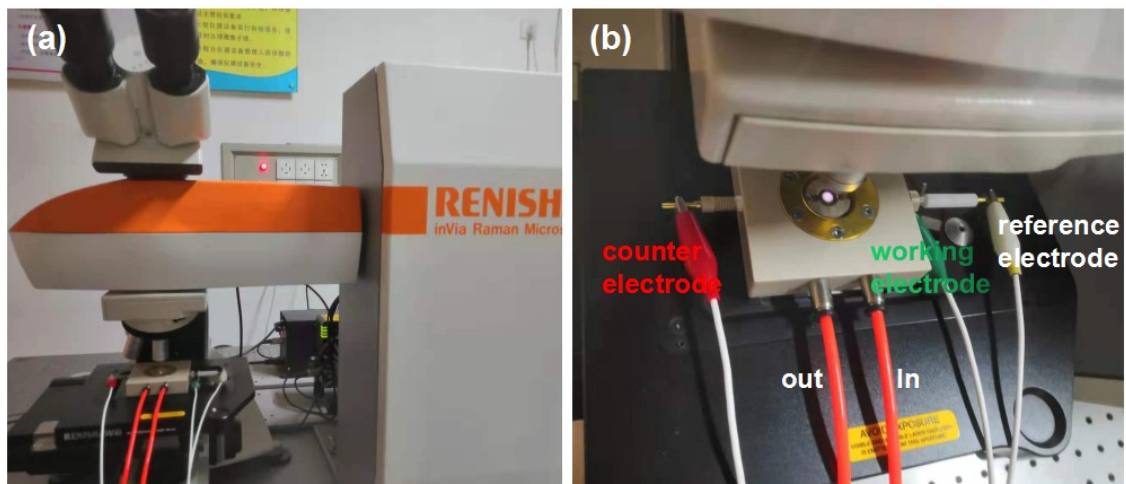

**Fig. S12** Photos of the *in-situ* Raman tests of the CO<sub>2</sub>RR over the ZrO<sub>2</sub>/Cu-Cu<sub>2</sub>O catalyst.

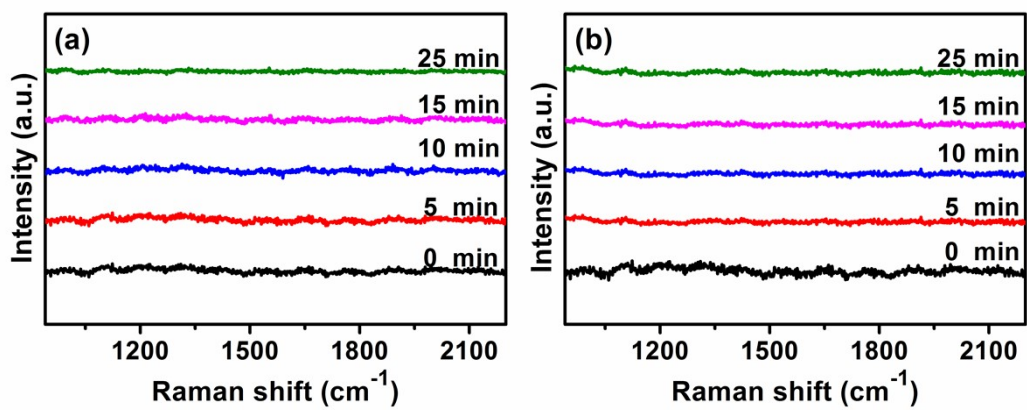

**Fig. S13** *In-situ* Raman spectra of the CO<sub>2</sub>RR over the Cu-Cu<sub>2</sub>O (a) and ZrO<sub>2</sub> (b) catalysts at different times.

## References

- [1] D. Tan, C. Cui, J. Shi, Z. Luo, B. Zhang, X. Tan, B. Han, L. Zheng, Z. Jing, and J. Zhang. Nitrogen carbon layer coated nickel nanoparticles for efficient electrocatalytic reduction of carbon dioxide. *Nano Res.*, 2019, **12**, 1167-1172.
- [2] S. Gao, Y. Lin, X. Jiao, Y. Sun, Q. Luo, W. Zhang, D. Li, J. Yang, and Y. Xie. Partially oxidized atomic cobalt layers for carbon dioxide electroreduction to liquid fuel. *Nature*, 2016, **529**, 68-71.
- [3] G. Kresse, and J. Furthmüller. Efficiency of ab-initio total energy calculations for metals and semiconductors using a plane-wave basis set. *Comp. Mater. Sci.*, 1996, **6**, 15-50.
- [4] G. Kresse, and J. Furthmüller. Efficient iterative schemes for ab-initio total-energy calculations using a plane-wave basis set. *Phys. Rev. B*, 1996, **54**, 11169.
- [5] J.P. Perdew, K. Burke, and M. Ernzerhof. Generalized gradient approximation made simple. *Phys. Rev. Lett.*, 1998, **77**, 3865-3868.
- [6] G. Kresse, and D. Joubert. From ultrasoft pseudopotentials to the projector augmented-wave method. *Phys. Rev. B*, 1999, **59**, 1758-1775.
- [7] Q. Wan, J. Zhang, B. Zhang, D. Tan, L. Yao, L. Zheng, F. Zhang, L. Liu, X. Cheng, and B. Han. Boron-doped CuO nanobundles for electroreduction of carbon dioxide to ethylene. *Green Chem.*, 2020, **22**, 2750-2754.
- [8] B. Zhang, J. Zhang, M. Hua, Q. Wan, Z. Su, X. Tan, L. Liu, F. Zhang, G. Chen, D. Tan, X. Cheng, B. Han, L. Zheng, and G. Mo. Highly electrocatalytic ethylene production from CO<sub>2</sub> on nanodeficient Cu nanosheets. *J. Am. Chem. Soc.* 2020, **142**, 13606-13613.
- [9] Q. Li, W. Zhu, J. Fu, H. Zhang, G. Wu, and S. Sun. Controlled assembly of Cu nanoparticles on pyridinic-N rich graphene for electrochemical reduction of CO<sub>2</sub> to ethylene. *Nano Energy*, 2016, **24**, 1-9.
- [10] J. Kim, W. Choi, J.W. Park, C. Kim, M. Kim, and H. Song. Branched copper oxide nanoparticles induce highly selective ethylene production by electrochemical carbon dioxide. *J. Am. Chem. Soc.*, 2019, **141**, 6986-6994.
- [11] M. Spodaryk, K. Zhao, J. Zhang, E. Oveisi, and A. Züttel. The role of malachite nanorods for the electrochemical reduction of CO<sub>2</sub> to C<sub>2</sub> hydrocarbons. *Electrochim. Acta*, 2019, **297**, 55-60.
- [12] H. Mistry, A.S. Varela, C.S. Bonifacio, I. Zegkinoglou, I. Sinev, Y.-W. Choi, Kisslinger, E.A. Stach, J.C. Yang, P. Strasser, and B.R. Cuenya. Highly selective plasma-activated copper catalysts for carbon dioxide reduction to ethylene. *Nat. Commun.*, 2016, **7**, 12123.
- [13] P. De Luna, S. Jia, Q. Zhu, M. Chu, S. Han, R. Feng, J. Zhai, W. Xia, M. He, H. Wu, and B. Han. Hierarchical metal-polymer hybrids for enhanced CO<sub>2</sub> electroreduction. *Angew. Chem. Int. Ed.*, 2021, **60**, 10977-10982.
- [14] Q. Wan, J. Zhang, B. Zhang, D. Tan, L. Yao, L. Zheng, F. Zhang, L. Liu, X. Cheng, and B. Han. Boron-doped CuO nanobundles for electroreduction of carbon dioxide to ethylene. *Green Chem.*, 2020, **22**, 2750-2754.
- [15] H. Jung, S.Y. Lee, C.W. Lee, M.K. Cho, D.H. Won, C. Kim, H.-S. Oh, B.K. Min, and Y.J. Hwang. Electrochemical fragmentation of Cu<sub>2</sub>O nanoparticles enhancing selective C-C coupling from CO<sub>2</sub> reduction reaction. *J. Am. Chem. Soc.*, 2019, **141**, 4624-4633.

- [16] Y. Mi, X. Peng, X. Liu, and J. Luo. Selective formation of C<sub>2</sub> products from electrochemical CO<sub>2</sub> reduction over Cu<sub>1.8</sub>Se nanowires. *ACS Appl. Energ. Mater.*, 2018, **1**, 5119-5123.
- [17] Y. Zhou, F. Che, M. Liu, C. Zou, Z. Liang, P. De Luna, H. Yuan, J. Li, Z. Wang, H. Xie, H. Li, P. Chen, E. Bladt, R. Quintero-Bermudez, T.-K. Sham, S. Bals, J. Hofkens, D. Sinton, G. Chen, and E.H. Sargent, Dopant-induced electron localization drives CO<sub>2</sub> reduction to C<sub>2</sub> hydrocarbons. *Nat. Chem.*, 2018, **10**, 974-980.
- [18] S. Jia, Q. Zhu, H. Wu, M.E. Chu, S. Han, R. Feng, J. Tu, J. Zhai, and B. Han. Efficient electrocatalytic reduction of carbon dioxide to ethylene on copper-antimony bimetallic alloy catalyst. *Chin. J. Catal.*, 2020, **41**, 1091-1098.
- [19] S. Chu, X. Yan, C. Choi, S. Hong, A.W. Robertson, J. Masa, B. Han, Y. Jung, and Z. Sun. Stabilization of Cu<sup>+</sup> by tuning a CuO-CeO<sub>2</sub> interface for selective electrochemical CO<sub>2</sub> reduction to ethylene. *Green Chem.*, 2020, **22**, 6540-6546.
- [20] W. Zhang, C. Huang, Q. Xiao, L. Yu, L. Shuai, P. An, J. Zhang, M. Qiu, Z. Ren, and Y. Yu. A typical oxygen bearing copper boosts ethylene selectivity toward electrocatalytic CO<sub>2</sub> reduction. *J. Am. Chem. Soc.*, 2020, **142**, 11417-11427.
- [21] A. Loiudice, P. Lobaccaro, E.A. Kamali, T. Thao, B.H. Huang, J.W. Ager, and R. Buonsanti. Tailoring copper nanocrystals towards C<sub>2</sub> products in electrochemical CO<sub>2</sub> reduction. *Angew. Chem. Int. Ed.*, 2016, **55**, 5889-5792.
- [22] L. Hou, J. Han, C. Wang, Y. Zhang, Y. Wang, Z. Bai, Y. Gu, Y. Gao, and X. Yan. Ag nanoparticle embedded Cu nanoporous hybrid arrays for the selective electrocatalytic reduction of CO<sub>2</sub> towards ethylene. *Inorg. Chem. Front.*, 2020, **7**, 2097-2106.
- [23] Z. Han, R. Kortlever, H.-Y. Chen, J.C. Peters, and T. Agapie. CO<sub>2</sub> reduction selective for C<sub>≥2</sub> products on polycrystalline copper with *N*-substituted pyridinium additives. *ACS Cent. Sci.*, 2017, **3**, 853-859.
- [24] J. Huang, M. Mensi, E. Oveisi, V. Mantella, and R. Buonsanti. Structural sensitivities in bimetallic catalysts for electrochemical CO<sub>2</sub> reduction revealed by Ag-Cu nanodimers. *J. Am. Chem. Soc.*, 2019, **141**, 2490-2499.
- [25] K. Manthiram, B.J. Beberwyck, and A.P. Alivisatos. Enhanced electrochemical methanation of carbon dioxide with a dispersible nanoscale copper catalyst. *J. Am. Chem. Soc.*, 2014, **136**, 13319-13325.
- [26] D. Ren, Y. Deng, A.D. Handoko, C.S. Chen, S. Malkhandi, and B.S. Yeo. Selective electrochemical reduction of carbon dioxide to ethylene and ethanol on copper(I) oxide catalysts. *ACS Catal.*, 2015, **5**, 2814-2821.
- [27] K.D. Yang, W.R. Ko, J.H. Lee, S.J. Kim, H. Lee, H.L. Min, and K.T. Nam. Morphology-directed selective production of ethylene or ethane from CO<sub>2</sub> on a Cu mesopore electrode. *Angew. Chem. Int. Ed.*, 2017, **129**, 814-818.
- [28] P. De Luna, R. Quintero-Bermudez, C.-T. Dinh, M.B. Ross, O.S. Bushuyev, P. Todorović, T. Regier, S.O. Kelley, P. Yang, and E.H. Sargent. Catalyst electro-redeposition controls morphology and oxidation state for selective carbon dioxide reduction. *Nat. Catal.*, 2018, **1**, 103-110.
- [29] D. Kim, C.S. Kley, Y. Li, and P. Yang. Copper nanoparticle ensembles for selective electroreduction of CO<sub>2</sub> to C<sub>2</sub>-C<sub>3</sub> products. *Proc. Natl. Acad. Sci. U.S.A.*, 2017, **114**, 0560-10565.



- [30] H. Yun, A.D. Handoko, P. Hirunsit, and B.S. Yeo. Electrochemical reduction of CO<sub>2</sub> using copper single-crystal surfaces: effects of \*CO coverage on the selective formation of ethylene. *ACS Catal.*, 2019, **7**, 1749-1756.
- [31] W. Tang, A.A. Peterson, A.S. Varela, Z.P. Jovanov, L. Bech, W.J. Durand, S. Dahl, J.K. Nørskov, and I. Chorkendorff. The importance of surface morphology in controlling the selectivity of polycrystalline copper for CO<sub>2</sub> electroreduction. *Phys. Chem. Chem. Phys.*, 2011, **14**, 76-81.
- [32] X. Wei, Z. Yin, K. Lyu, Z. Li, J. Gong, G. Wang, L. Xiao, J. Lu, and L. Zhuang. Highly selective reduction of CO<sub>2</sub> to C<sub>2+</sub> hydrocarbons at copper/polyaniline interfaces. *ACS Catal.*, 2020, **10**, 4103-4111.
- [33] H. Ning, X. Wang, W. Wang, Q. Mao, Z. Yang, Q. Zhao, Y. Song, and M. Wu. Cubic Cu<sub>2</sub>O on nitrogen-doped carbon shells for electrocatalytic CO<sub>2</sub> reduction to C<sub>2</sub>H<sub>4</sub>. *Carbon*, 2019, **146**, 218-223.
- [34] D. Kim, S. Lee, J.D. Ocon, B. Jeong, J.K. Lee, and J. Lee. Insights into an autonomously formed oxygen evacuated Cu<sub>2</sub>O electrode for the selective production of C<sub>2</sub>H<sub>4</sub> from CO<sub>2</sub>. *Phys. Chem. Chem. Phys.*, 2015, **17**, 824-830.
- [35] C. Chen, F. Sun, L. Lu, D. Yang, J. Ma Q. Zhu, Q. Qian, and B. Han. Efficient electroreduction of CO<sub>2</sub> to C<sub>2</sub> products over B-doped oxide-derived copper. *Green Chem.*, 2018, **20**, 4579-4583.
- [36] D. Chen, Y. Wang, D. Liu, H. Liu, C. Qian, H. He, and J. Yang. Surface composition dominates the electrocatalytic reduction of CO<sub>2</sub> on ultrafine CuPd nanoalloys. *Carbon Energy*, 2020, **2**, 443-451.
- [37] D. Ren, N.T. Wong, A.D. Handoko, Y. Huang, and B.S. Yeo. Mechanistic insights into the enhanced activity and stability of agglomerated Cu nanocrystals for the electrochemical reduction of carbon dioxide to *n*-propanol. *J. Phys. Chem. Lett.*, 2016, **7**, 20-24.
